# Supplementary material
Source: publisher figshare collection journal article supplement (https://frontiersin.figshare.com/ndownloader/files/20077211)
Supplement: Supplementary file 1 [file 20077211]

Supplementary Table 1: Experimental gillnet catch composition, expressed as catch per unit effort (CPUE) in numbers and weight, in Lake Liambezi between August 2010 and July 2011; reproduced from Peel et al. 2015

| Taxon                                                                      | CPUE<br>(fish net <sup>-1</sup> night <sup>-1</sup> ) | CPUE<br>(kg net <sup>-1</sup> night <sup>-1</sup> ) |
|----------------------------------------------------------------------------|-------------------------------------------------------|-----------------------------------------------------|
| <b>Mormyridae</b>                                                          |                                                       |                                                     |
| <i>Marcusenius altisambesi</i> Kramer, Skelton, van der Bank & Wink, 2007  | 9.78                                                  | 0.42                                                |
| <i>Mormyrus lacerda</i> Castelnau, 1861                                    | 0.14                                                  | 0.01                                                |
| <i>Petrocephalus</i> cf. <i>okavangensis</i> Kramer, Bills & Skelton, 2011 | 21.26                                                 | 0.16                                                |
| <i>Pollimyrus</i> cf. <i>cuandoensis</i> Kramer, van der Bank & Wink, 2014 | 0.35                                                  | 0.00                                                |
| <b>Cyprinidae</b>                                                          |                                                       |                                                     |
| <i>Barbus barnardi</i> Jubb, 1961                                          | 0.12                                                  | 0.00                                                |
| <i>Barbus bifrenatus</i> Fowler, 1935                                      | 0.31                                                  | 0.00                                                |
| <i>Barbus paludinosus</i> Peters, 1852                                     | 1.65                                                  | 0.01                                                |
| <i>Barbus poechii</i> Steindachner, 1911                                   | 2.32                                                  | 0.02                                                |
| <i>Barbus radiatus</i> Peters, 1853                                        | 4.00                                                  | 0.02                                                |
| <i>Barbus unitaeniatus</i> Günther, 1866                                   | 0.14                                                  | 0.00                                                |
| <i>Labeo cylindricus</i> Peters, 1852                                      | 0.33                                                  | 0.01                                                |
| <b>Alestidae</b>                                                           |                                                       |                                                     |
| <i>Brycinus lateralis</i> (Boulenger, 1900)                                | 441.00                                                | 4.11                                                |
| <i>Micralestes acutidens</i> (Peters, 1852)                                | 0.21                                                  | 0.00                                                |
| <i>Rhabdalestes maunensis</i> (Fowler, 1935)                               | 63.58                                                 | 0.11                                                |
| <b>Hepsetidae</b>                                                          |                                                       |                                                     |
| <i>Hepsetus cuvieri</i> Castelnau, 1861                                    | 0.63                                                  | 0.22                                                |
| <b>Schilbeidae</b>                                                         |                                                       |                                                     |
| <i>Schilbe intermedius</i> Rüppell, 1832                                   | 60.17                                                 | 4.02                                                |
| <b>Clariidae</b>                                                           |                                                       |                                                     |
| <i>Clarias gariepinus</i> (Burchell, 1822)                                 | 0.40                                                  | 0.28                                                |
| <i>Clarias ngamensis</i> Castelnau, 1861                                   | 0.14                                                  | 0.07                                                |
| <b>Mochokidae</b>                                                          |                                                       |                                                     |
| <i>Synodontis nigromaculatus</i> Boulenger 1905                            | 0.09                                                  | 0.01                                                |
| <i>Synodontis</i> spp.                                                     | 5.49                                                  | 0.25                                                |
| <b>Cichlidae</b>                                                           |                                                       |                                                     |
| <i>Oreochromis andersonii</i> (Castelnau, 1861)                            | 0.59                                                  | 0.06                                                |
| <i>Oreochromis macrochir</i> (Boulenger, 1912)                             | 0.26                                                  | 0.04                                                |
| <i>Pharyngochromis acuticeps</i> (Steindachner, 1866)                      | 3.20                                                  | 0.07                                                |
| <i>Pseudocrenilabrus philander</i> (Weber, 1897)                           | 2.00                                                  | 0.01                                                |
| <i>Sargochromis carlottae</i> (Boulenger, 1905)                            | 0.12                                                  | 0.00                                                |
| <i>Sargochromis</i> sp. 'green bream'                                      | 0.42                                                  | 0.05                                                |
| <i>Serranochromis macrocephalus</i> (Boulenger, 1899)                      | 1.48                                                  | 0.22                                                |
| <i>Coptodon rendalli</i> (Boulenger, 1896)                                 | 0.80                                                  | 0.04                                                |
| <i>Tilapia sparrmanii</i> A.Smith, 1840                                    | 9.57                                                  | 0.23                                                |
